# Supplementary material for: Patient Awareness of CKD: A Systematic Review and Meta-analysis of Patient-Oriented Questions and Study Setting
Source: PubMed Central journal article supplement — Kidney Med. 2021 Jun 1;3(4):576–585.e1. doi: 10.1016/j.xkme.2021.03.014 (PMC8350814; doi:10.1016/j.xkme.2021.03.014), 2021-06-01
Supplement: mmc1.pdf [file mmc1.pdf]

**Figure S1: Meta-analysis of awareness prevalence of chronic kidney disease defined by eGFR <60 ml/min/1.73m<sup>2</sup>**

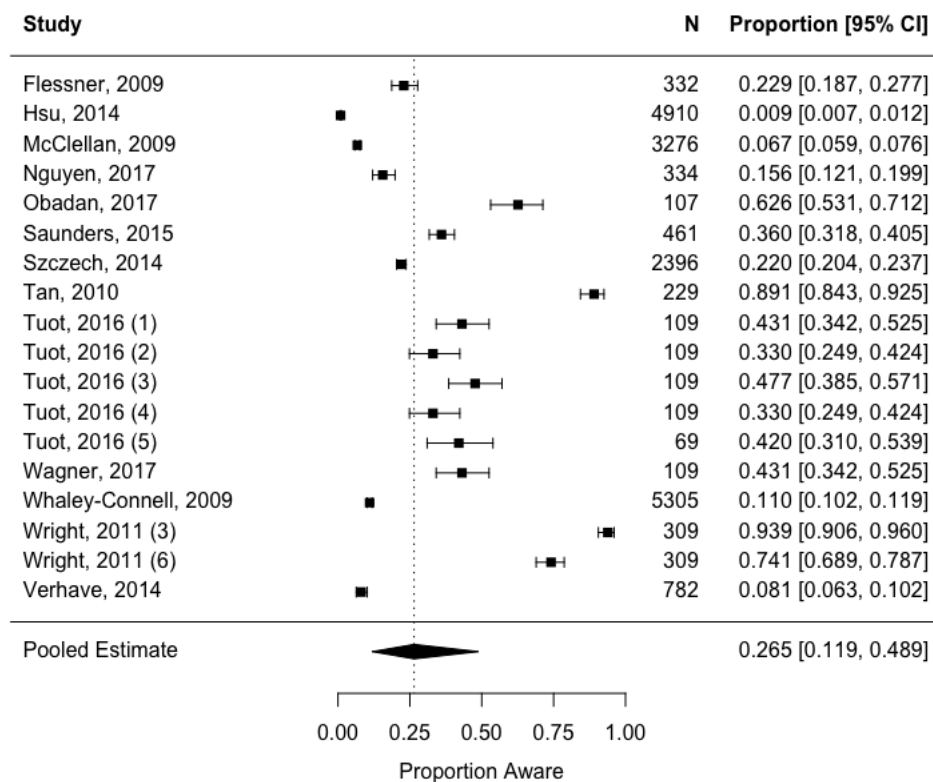

An individual study may be represented by more than one marker if it reported multiple estimates of awareness using different survey questions (numbered (1) weak or failing kidneys; (2) kidney disease; (3) kidney problem; (4) kidney damage; (5) protein in the urine; (6) chronic kidney disease).

**Figure S2: Meta-analysis of awareness prevalence of chronic kidney disease defined by eGFR <60 ml/min/1.73m<sup>2</sup>, by question wording**

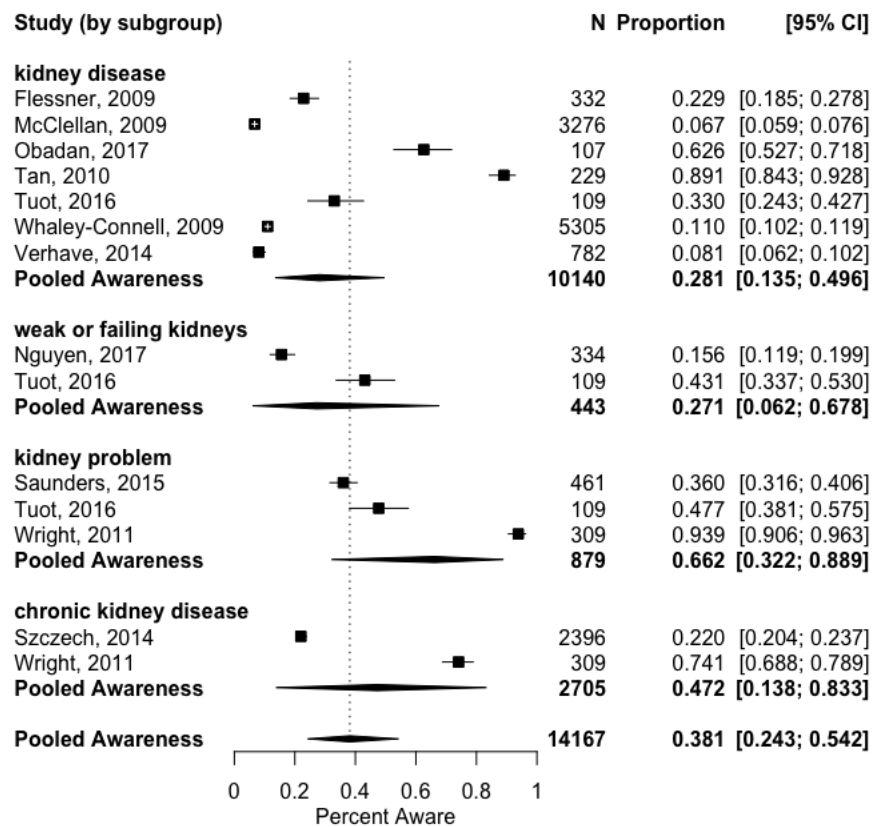

Heterogeneity by wording subgroup: "kidney disease" ( $p < 0.001$ ;  $I^2 = 99.1\%$ ); "weak or failing kidneys" ( $p < 0.001$ ;  $I^2 = 99.3\%$ ); "kidney problem" ( $p < 0.001$ ;  $I^2 = 99.2\%$ ); "chronic kidney disease" ( $p < 0.001$ ;  $I^2 = 99.3\%$ ). An individual study may be represented by more than one marker if it reported multiple estimates of awareness using different survey questions.

**Figure S3: Meta-analysis of awareness prevalence of chronic kidney disease defined by eGFR <60 ml/min/1.73m<sup>2</sup>, by study setting**

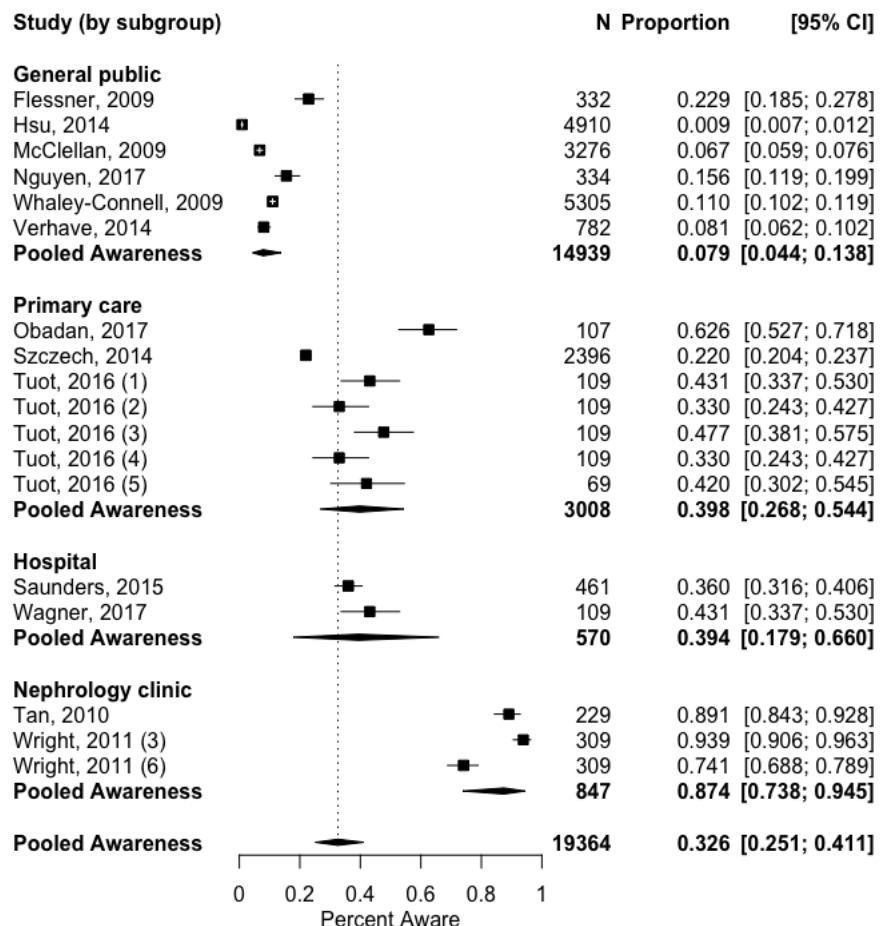

Heterogeneity by setting subgroup: General public ( $p < 0.001$ ;  $I^2 = 98.6\%$ ); Primary care ( $p < 0.001$ ;  $I^2 = 99.3\%$ ); Hospital ( $p < 0.001$ ;  $I^2 = 99.3\%$ ); Nephrology clinic ( $p < 0.001$ ;  $I^2 = 98.8\%$ ). An individual study may be represented by more than one marker if it reported multiple estimates of awareness using different survey questions (numbered (1) weak or failing kidneys; (2) kidney disease; (3) kidney problem; (4) kidney damage; (5) protein in the urine; (6) chronic kidney disease).

## Item S1: Detailed Search Strategies

All databases except EMBASE:

((("patient attitudes" OR patient awareness OR "awareness of disease" OR "health literacy" OR "health knowledge" OR "self-care" OR comprehension OR "patient understanding" OR "patient knowledge") AND ("Renal Insufficiency, Chronic"[Mesh] OR "kidney disease" OR ckd OR "renal disease" OR "renal insufficiency" OR "kidney damage" OR "kidney problem" OR "kidney insufficiency" OR "renal dysfunction" OR "kidney dysfunction" OR "kidney problem" OR "weak kidneys" OR "failing kidneys") AND (survey OR questionnaire OR surveys OR questionnaires OR "medical history" OR "history taking" OR self-report))

EMBASE:

('patient awareness' OR 'awareness of disease' OR 'health literacy'/exp OR 'health literacy' OR 'health knowledge'/exp OR 'health knowledge' OR 'self care'/exp OR 'self care' OR 'comprehension'/exp OR comprehension OR 'patient understanding' OR 'patient knowledge'/exp OR 'patient knowledge') AND ('kidney disease'/exp OR 'kidney disease' OR ckd OR 'renal disease'/exp OR 'renal disease' OR 'renal insufficiency'/exp OR 'renal insufficiency' OR 'kidney damage'/exp OR 'kidney damage' OR 'kidney insufficiency'/exp OR 'kidney insufficiency' OR 'renal dysfunction'/exp OR 'renal dysfunction' OR 'kidney dysfunction'/exp OR 'kidney dysfunction' OR 'kidney problem' OR 'weak kidneys' OR 'failing kidneys') AND ('survey'/exp OR survey OR 'questionnaire'/exp OR questionnaire OR 'surveys'/exp OR surveys OR 'questionnaires'/exp OR questionnaires OR 'medical history'/exp OR 'medical history' OR 'history taking'/exp OR 'history taking' OR 'self report'/exp OR 'self report' OR (asking AND (working OR phrasing)))

**Table S1: Full Data Abstraction Table**

| Authors                                                          | Country | Survey years         | Study population                        | Question wording                                                                                                                                                                                                                                                                                      | Overall awareness                        | Overall CKD definition                                                   | Awareness by CKD G and A category                                                                                        | Characteristics associated with higher awareness                                                                                               |
|------------------------------------------------------------------|---------|----------------------|-----------------------------------------|-------------------------------------------------------------------------------------------------------------------------------------------------------------------------------------------------------------------------------------------------------------------------------------------------------|------------------------------------------|--------------------------------------------------------------------------|--------------------------------------------------------------------------------------------------------------------------|------------------------------------------------------------------------------------------------------------------------------------------------|
| <sup>31</sup> Agrawal, V.; Jaar, B.G. et al, 2012                | US      | 2000-2010            | KEEP                                    | Have you ever been told by a doctor or a health care professional that you have kidney disease?<br>Have you ever been told by a doctor or a health care professional that you have protein or blood in your urine?<br>Not explicitly indicated whether yes to one or either or both defined awareness | 6611/27927 (23.7%)                       | All KDIGO CKD                                                            | G1/2: 2240/10082 (22.2%)<br>G3: 3759/16684 (22.5%)<br>G4/5: 612/1161 (52.7%)                                             | Age <65, comorbid diabetes, hypertension, or cardiovascular disease                                                                            |
| <sup>41</sup> Coresh, J.; Byrd-Holt, D. et al, 2005              | US      | 1988-1994, 1999-2000 | NHANES                                  | Has a doctor, nurse, or other health professional ever told you have weak or failing kidneys? Do NOT include kidney stones, bladder infection, or incontinence.                                                                                                                                       | 24% (n = 4101); 1999-2000                | eGFR 15-59 with UACR >30mg/g                                             | G1A1: 1.1%<br>G1A2-3: 5.5%<br>G2A1: 1.6%<br>G2A2-3: 3.9%<br>G3A1: 2.4%<br>G3A2-3: 18.6%<br>G3A1-3: 8% (n = 3.7% of 4101) | Lower eGFR, higher albuminuria, male sex                                                                                                       |
| <sup>23</sup> Dharmarajan, S.H.; Bragg-Gresham, J.L. et al, 2017 | US      | 2011-2012            | NHANES                                  | Has a doctor, nurse, or other health professional ever told you have weak or failing kidneys? Do NOT include kidney stones, bladder infection, or incontinence.                                                                                                                                       | 9.1% (n = 5055 among whom 14.5% had CKD) | CKD defined as eGFR 15-59 or UACR >30.                                   |                                                                                                                          | Diabetes, hypertension                                                                                                                         |
| <sup>36</sup> Flessner, M.F.; Wyatt, S.B. et al, 2009            | US      | 2000-2004            | Jackson Heart Study                     | Have you ever been told by a doctor or health care professional that you have kidney disease?                                                                                                                                                                                                         | 107/685                                  | All KDIGO CKD                                                            | G1: 4/148<br>G2: 15/186<br>G3: 51/291<br>G4/5: 27/41                                                                     | More severe CKD                                                                                                                                |
| <sup>16</sup> Gaffney H.; Blakeman T. et al, 2014                | UK      | 2012                 | Primary care patients with CKD G3       | Please tell us if you have any of the following long-term medical conditions; "kidney problems" as an option<br>If patient asked clarification: "Has your GP or other health professional told you that you have problems with your kidneys?"                                                         | 209/436                                  | CKD G3                                                                   | G3a: 139/330 = 42%<br>G3b: 70/106 = 66%<br>No proteinuria: 179/388 = 46%<br>Yes proteinuria: 30/48 = 63%                 | Female sex, more severe CKD, proteinuria, higher levels of general anxiety                                                                     |
| <sup>40</sup> Hsu, C.; Hwang, S. et al, 2006                     | Taiwan  | 2001-2002            | Taiwan National Health Interview Survey | Have you ever been told by a doctor or health care professional of weak or failing kidneys?                                                                                                                                                                                                           | 31/389                                   | CKD G3                                                                   | G3a: 18/305 (5.9%)<br>G3b: 13/84 (15.5%)                                                                                 | More severe CKD, male sex, greater number of hospitalizations                                                                                  |
| <sup>28</sup> Hsu, Y.; Lee, P. et al, 2014                       | Taiwan  | 2002 or later        | National survey                         | Do you have physician-diagnosed renal disease or renal failure?                                                                                                                                                                                                                                       | 0.9% (n = 4910)                          |                                                                          | G3: 0.9%<br>G4-5: 9.6%                                                                                                   | Male sex                                                                                                                                       |
| <sup>37</sup> McClellan, W.M.; Newsome, B.B. et al, 2008         | US      | 2003-2007            | REGARDS                                 | Has a doctor or other health professional ever told you that you had kidney disease?                                                                                                                                                                                                                  | 220/3276 (6.7%)                          | eGFR <60                                                                 | G3: 149/3039 (4.9%)<br>G4/5: 71/237 (30.0%)                                                                              | Lower eGFR, coronary heart disease                                                                                                             |
| <sup>42</sup> Nickolas, T.L.; Frisch, G.D. et al, 2004           | US      | 1999-2000            | NHANES                                  | Has a doctor, nurse, or other health professional ever told you have weak or failing kidneys? Do NOT include kidney stones, bladder infection, or incontinence.                                                                                                                                       | 110/384 (pooled CKD)                     | Defined early CKD = eGFR ≥60 with UACR ≥300 (men) or ≥355 (women), or if | G1: 40.5% (n = 263)<br>G2: 29.3% (n = 48)<br>G3: 22% (n = 66)<br>G4: 44.5% (n = 7)<br>G5: 100% (n = 19)<br>Early: 93/311 | Younger age, female sex, non-Hispanic black race, hypertension, diabetes, cardiovascular disease, higher systolic blood pressure, higher UACR, |

|                                                          |    |           |                                                          |                                                                                                                                                                                                                                                                                              |                                                                    |                                                                                                       |                                                                                                                                                                                                                |                                                                                                                                                         |
|----------------------------------------------------------|----|-----------|----------------------------------------------------------|----------------------------------------------------------------------------------------------------------------------------------------------------------------------------------------------------------------------------------------------------------------------------------------------|--------------------------------------------------------------------|-------------------------------------------------------------------------------------------------------|----------------------------------------------------------------------------------------------------------------------------------------------------------------------------------------------------------------|---------------------------------------------------------------------------------------------------------------------------------------------------------|
|                                                          |    |           |                                                          |                                                                                                                                                                                                                                                                                              |                                                                    | diabetics, UACR $\geq$ 17 (men) or 25 (women); late CKD = eGFR <60 (MDRD). Pooled CKD = early + late. | Late: 17/73                                                                                                                                                                                                    | higher creatinine. In multivariable analysis: female, non-Hispanic black race, hypertension.                                                            |
| <sup>14</sup> Nguyen H.A., Anderson C.A.M. et al, 2017   | US | 2011-2012 | NHANES                                                   | Has a doctor, nurse, or other health professional ever told you have weak or failing kidneys? Do NOT include kidney stones, bladder infection, or incontinence.                                                                                                                              | 52/334                                                             | eGFR <60                                                                                              |                                                                                                                                                                                                                |                                                                                                                                                         |
| <sup>13</sup> Obadan N.O., Walker R.J. et al, 2017       | US |           | Primary care patients with diabetes                      | Has a doctor, nurse, or other health professional ever told you that you have kidney disease? Do not include kidney stones, bladder infection or incontinence. Have you ever had kidney failure that required dialysis or a kidney transplant? (awareness defined as yes to either question) | 67/107                                                             | eGFR <60                                                                                              |                                                                                                                                                                                                                | Non-Hispanic black race, having a college education, history of myocardial infarction, hypertension, having Medicare, VA insurance, or other insurance. |
| <sup>21</sup> Plantinga L.C.; Boulware L.E. et al, 2008  | US | 1999-2004 | NHANES                                                   | Has a doctor, nurse, or other health professional ever told you have weak or failing kidneys? Do NOT include kidney stones, bladder infection, or incontinence.                                                                                                                              | 205/2992                                                           | CKD G1-4 by KDIGO                                                                                     | Overall: 205/2992 (6.0% weighted)<br>G1: 24/675 (3.7%);<br>G2 36/926 (3.5%);<br>G3 111/1314 (7.8%);<br>G4 34/77 (41.8%)                                                                                        | Non-Hispanic black or Mexican American, male sex, proteinuria, hypertension, diabetes, obesity, more advanced CKD                                       |
| <sup>33</sup> Plantinga L.; Grubbs, V. et al, 2011       | US | 1999-2004 | NHANES                                                   | Has a doctor, nurse, or other health professional ever told you have weak or failing kidneys? Do NOT include kidney stones, bladder infection, or incontinence.                                                                                                                              | 7.5% (n = 2461)                                                    | All KDIGO CKD                                                                                         | G1-2: 4.4% (n = 1137)<br>G3-4: 10.2% (n = 1324)                                                                                                                                                                |                                                                                                                                                         |
| <sup>38</sup> Saab, G.; Whaley-Connell, A.T. et al, 2008 | US | 2000-2005 | KEEP                                                     | Have you ever been told by a doctor or healthcare professional you have kidney disease (do not include kidney stones, bladder infections or incontinence)?                                                                                                                                   | 815/12907 (6.3%)                                                   | All KDIGO CKD                                                                                         | G1: 60/1377 (4.4%)<br>G2: 105/2159 (4.9%)<br>G3: 478/8866 (5.4%)<br>G4: 137/427 (32.1%)<br>G5: 35/78 (44.9%)                                                                                                   | More recent years, more severe CKD                                                                                                                      |
| <sup>39</sup> Sarafidis, P.A.; Li, S. et al, 2008        | US | 2000-2005 | KEEP                                                     | Have you ever been told by a doctor or healthcare professional you have kidney disease (do not include kidney stones, bladder infections or incontinence)?                                                                                                                                   | 705/10813                                                          | All KDIGO CKD                                                                                         |                                                                                                                                                                                                                |                                                                                                                                                         |
| <sup>15</sup> Saunders M.R.; Kim S.D. et al, 2015        | US | 2012-2013 | Adults with CKD diagnosis code, discharged from hospital | Patient self-report of "kidney problems" within a list of chronic medical conditions                                                                                                                                                                                                         | 191/590                                                            | All KDIGO CKD                                                                                         | G1-2: 20/115<br>G3: 83/300<br>G4: 54/112<br>G5: 31/49                                                                                                                                                          | Younger age, more severe CKD, higher Mini-Mental State Exam score                                                                                       |
| <sup>43</sup> Shah, A.; Fried, L.F. et al, 2012          | US | 2000-2010 | KEEP                                                     | Have you ever been told by a health care professional that you have kidney disease? Have you ever been told by a doctor or a health care professional that you have protein or blood in your urine?                                                                                          | 6751/29144 (either question)<br>3022/28923 (yes to kidney disease) | All KDIGO CKD                                                                                         | Either question:<br>G1: 965/4590<br>G2: 1275/5453<br>G3a: 2448/12941<br>G3b: 1415/4892<br>G4: 541/1105<br>G5: 107/163<br>"Kidney disease":<br>G1: 234/4565<br>G2: 365/5402<br>G3a: 1021/12849<br>G3b: 862/4849 | Diabetes, reported difficult access to care                                                                                                             |

|                                                         |         |           |                                                                                                       |                                                                                                                                                                                                                                                                                                                                                                                                                                                                                                            |                                                                                                                                                                                                |                                                                      |                                                                                                                                                                                                                                                                                                                |                                                                                                             |
|---------------------------------------------------------|---------|-----------|-------------------------------------------------------------------------------------------------------|------------------------------------------------------------------------------------------------------------------------------------------------------------------------------------------------------------------------------------------------------------------------------------------------------------------------------------------------------------------------------------------------------------------------------------------------------------------------------------------------------------|------------------------------------------------------------------------------------------------------------------------------------------------------------------------------------------------|----------------------------------------------------------------------|----------------------------------------------------------------------------------------------------------------------------------------------------------------------------------------------------------------------------------------------------------------------------------------------------------------|-------------------------------------------------------------------------------------------------------------|
|                                                         |         |           |                                                                                                       |                                                                                                                                                                                                                                                                                                                                                                                                                                                                                                            |                                                                                                                                                                                                |                                                                      | G4: 443/1096<br>G5: 97/162                                                                                                                                                                                                                                                                                     |                                                                                                             |
| <sup>24</sup> Shirazian, S.; Diep, R. et al, 2016       | US      | 2005-2010 | NHANES                                                                                                | Has a doctor, nurse, or other health professional ever told you have weak or failing kidneys? Do NOT include kidney stones, bladder infection, or incontinence.                                                                                                                                                                                                                                                                                                                                            | 6.4% (n = 2500)                                                                                                                                                                                | eGFR 15-60 or UACR ≥30                                               |                                                                                                                                                                                                                                                                                                                | Higher levels of depressive symptoms                                                                        |
| <sup>25</sup> Szczzech, L.A.; Stewart, R.C. et al, 2014 | US      | 2011-2012 | Adults in primary care with type 2 diabetes ≥1 year                                                   | Have you ever been told by a doctor or other health care professional that you have a chronic kidney disease (a decreased GFR, or elevated serum creatinine, or weak and/or failing kidneys)?                                                                                                                                                                                                                                                                                                              | 607/5036 (12.1%)                                                                                                                                                                               | All KDIGO CKD                                                        | G1: 11/1038 (1.1%)<br>G2: 79/1602 (4.9%)<br>G3: 389/2156 (18.0%)<br>G4: 118/223 (52.9%)<br>G5: 10/17 (58.8%)                                                                                                                                                                                                   | Being correctly diagnosed with CKD by primary care providers                                                |
| <sup>20</sup> Tan A.U.; Hoffman B. et al, 2010          | US      | 2007-2008 | CKD G3-4, seen in nephrology clinic                                                                   | Do you have kidney disease (or have you ever had kidney disease)?                                                                                                                                                                                                                                                                                                                                                                                                                                          | 204/229                                                                                                                                                                                        | CKD G3-4                                                             |                                                                                                                                                                                                                                                                                                                |                                                                                                             |
| <sup>34</sup> Tuot, D.S.; Plantinga, L.C. et al, 2011   | US      | 1999-2008 | NHANES                                                                                                | Has a doctor, nurse, or other health professional ever told you have weak or failing kidneys? Do NOT include kidney stones, bladder infection, or incontinence.                                                                                                                                                                                                                                                                                                                                            | 9% (weighted; n = 1852)                                                                                                                                                                        | eGFR 15-59                                                           |                                                                                                                                                                                                                                                                                                                | Albuminuria and hyperkalemia. Independent of GFR, only albuminuria was associated with increased awareness. |
| <sup>32</sup> Tuot, D.S.; Plantinga, L.C. et al, 2012   | US      | 2003-2008 | NHANES                                                                                                | Has a doctor, nurse, or other health professional ever told you have weak or failing kidneys? Do NOT include kidney stones, bladder infection, or incontinence.                                                                                                                                                                                                                                                                                                                                            | 191/2404 (weighted = 7.4%)                                                                                                                                                                     | All KDIGO CKD                                                        |                                                                                                                                                                                                                                                                                                                |                                                                                                             |
| <sup>8</sup> Tuot D.S.; Zhu Y. et al, 2016              | US      | 2011-2014 | Saw PCP at least once in the previous 2 years, and had CKD, hypertension, diabetes, or hyperlipidemia | Have you ever been told by a doctor or health care professional that you have (multiple choice): 'kidney damage', 'kidney problem', 'protein in the urine' (only among those w proteinuria), 'weak or failing kidneys' (NHANES), 'kidney disease'                                                                                                                                                                                                                                                          | 0.332 (weak or failing kidneys)<br>0.277 (kidney disease)<br>0.401 (kidney problem)<br>0.264 (kidney damage)<br>0.398 (protein in the urine)<br>N = 176 for all except n = 83 for "protein..." | eGFR <60 or proteinuria (≥1+ UA or >30mg/g), at least 3 months apart | G1-2:<br>0.192 (weak or failing kidneys)<br>0.173 (kidney disease)<br>0.250 (kidney problem)<br>0.135 (kidney damage)<br>0.308 (protein in the urine)<br>G3-4:<br>0.431 (weak or failing kidneys)<br>0.333 (kidney disease)<br>0.482 (kidney problem)<br>0.330 (kidney damage)<br>0.417 (protein in the urine) | More severe CKD                                                                                             |
| <sup>27</sup> Verhave, J.C.; Troyanov, S. et al, 2014   | Canada  | 2009-2010 | Biobank (CARTaGENE) cohort of adults                                                                  | Has a doctor ever told you that you had kidney disease, such as renal failure, renal infection, or kidney stones? What kind of kidney disease was it: renal failure, renal infection, kidney stones, or other? Do you or did you have dialysis treatment? Have you had a kidney transplant? CKD awareness included participants who acknowledged renal failure, dialysis, or transplant or mentioned a condition associated with CKD in the other category; excluding reported renal infections or stones. | 8% (n = 782)                                                                                                                                                                                   | CKD defined as eGFR <60. No UACR or UPCR available.                  | CKD3a: 4% (n = 662)<br>CKD3b: 22% (n = 103)<br>CKD4: 9/12 (75%)<br>CKD5: 5/5 (100%)                                                                                                                                                                                                                            | Younger age, male sex, self-reported hypertension, hyperlipidemia, diabetes                                 |
| <sup>22</sup> Wagner, M.; Wanner, G.                    | Germany | 2012-2013 | EUROASPIRE IV survey, patients discharged                                                             | Have you ever been told by a doctor/health care provider that your kidney function is impaired, e.g. not as good as it would be expected?                                                                                                                                                                                                                                                                                                                                                                  | 54/158                                                                                                                                                                                         | All KDIGO CKD                                                        | G1A3 (0/1)<br>G2A2-3 (7/47)<br>G3a (33/83)<br>G3b (7/18)                                                                                                                                                                                                                                                       | Lower eGFR, heart failure history, obesity, CKD mentioned in discharge letter                               |

|                                                            |       |           |                                                 |                                                                                                                                                                 |                                           |                                       |                                                                                                                                                                                        |                                                                                                                                                                                                                                   |
|------------------------------------------------------------|-------|-----------|-------------------------------------------------|-----------------------------------------------------------------------------------------------------------------------------------------------------------------|-------------------------------------------|---------------------------------------|----------------------------------------------------------------------------------------------------------------------------------------------------------------------------------------|-----------------------------------------------------------------------------------------------------------------------------------------------------------------------------------------------------------------------------------|
| C. et al, 2017                                             |       |           | from hospitalization for coronary heart disease |                                                                                                                                                                 |                                           |                                       | G4 (6/7)<br>G5 (1/1)                                                                                                                                                                   |                                                                                                                                                                                                                                   |
| <sup>26</sup> Wang, F.; Zhang, L. et al, 2014              | China |           | National survey                                 | Have you ever been told by a doctor that you have kidney disease (excluding frank [sic] pain, or diagnosis of renal weakness by Chinese traditional medicine)?' | 446/4443 (10.04%)                         | CKD defined as eGFR < 60 or UACR > 30 | G1A2-3: 7.7%<br>G2A2-3: 9.6%<br>G3A1: 11.7%<br>G3A2-3: 16.7%<br>G4/5A1: 15.6%<br>G4/5A2: 61.8%                                                                                         | More severe CKD, albuminuria, higher education, having free medical insurance, receiving a health examination during previous 2 years, family history of kidney disease, self-reported concern about kidney disease, hypertension |
| <sup>35</sup> Whaley-Connell, A.; Sowers, J.R. et al, 2009 | US    | 2000-2007 | KEEP                                            | Have you ever been told by a doctor or healthcare professional you have kidney disease (do not include kidney stones, bladder infections or incontinence)?      | 736/7853 (9.4%)                           | All KDIGO CKD                         | G1-2: 154/2548 (6.0%)<br>G3-5: 582/5305 (11.0%)                                                                                                                                        | Self-reported cardiovascular disease, dyslipidemia, more severe CKD                                                                                                                                                               |
| <sup>30</sup> Whaley-Connell, A.; Shlipak, M.G. , 2012     | US    | 2000-2009 | KEEP                                            | Have you ever been told by a doctor or healthcare professional you have kidney disease (do not include kidney stones, bladder infections or incontinence)?      | 2660/28244                                | UACR ≥30mg/g or eGFR <60 (MDRD)       | G1: 4.9%<br>G2: 6.4%<br>G3: 9.2%<br>G4/5: 43.6%                                                                                                                                        | Lower GFR, albuminuria, diabetes, cardiovascular disease, cancer                                                                                                                                                                  |
| <sup>18</sup> Wright Nunes J.A.; Wallston K.A. et al, 2011 | US    | 2009      | CKD G1-5, seen in nephrology clinic             | Do you have a kidney problem? Do you have chronic kidney disease? (KIKS questionnaire)                                                                          | 373/399 (kidney problem)<br>277/399 (CKD) | All KDIGO CKD                         |                                                                                                                                                                                        | More severe CKD                                                                                                                                                                                                                   |
| <sup>19</sup> Wright J.A.; Wallston K.A. et al, 2011       | US    | 2009      | CKD G1-5, seen in nephrology clinic             | Do you have a kidney problem? Do you have chronic kidney disease? (KIKS questionnaire)                                                                          | 375/401 (kidney problem)<br>278/401 (CKD) | All KDIGO CKD                         | 83/90 (kidney problem, CKD G1-2)<br>181/195 (kidney problem, CKD G3)<br>111/114 (kidney problem, CKD G4-5)<br>50/92 (CKD, CKD G1-2)<br>130/195 (CKD, CKD G3)<br>98/114 (CKD, CKD G4-5) | More severe CKD                                                                                                                                                                                                                   |
| <sup>28</sup> Wright-Nunes, J.A.; Luther, J.M. et al, 2012 | US    |           | CKD G1-5, seen in nephrology clinic             | Do you have chronic kidney disease?                                                                                                                             | 133/338                                   | All KDIGO CKD                         |                                                                                                                                                                                        |                                                                                                                                                                                                                                   |
| <sup>17</sup> Wright Nunes J.; Greene J.H. et al, 2013     | US    | 2009-2010 | CKD G1-5, seen in nephrology clinic             | Do you have a kidney problem? Do you have chronic kidney disease? (KIKS questionnaire)                                                                          | 375/401 (kidney problem)<br>278/401 (CKD) | All KDIGO CKD                         |                                                                                                                                                                                        |                                                                                                                                                                                                                                   |



**Table S2: Risk of Bias Assessment**

| Study                | 1. Was the sample frame appropriate to address the target population? | 2. Were study participants sampled in an appropriate way? | 3. Was the sample size adequate? | 4. Were the study subjects and the setting described in detail? | 5. Was the data analysis conducted with sufficient coverage of the identified sample? | 6. Were valid methods used for the identification of the condition? | 7. Was the condition measured in a standard, reliable way for all participants? | 8. Was there appropriate statistical analysis? | 9. Was the response rate adequate, and if not, was the low response rate managed appropriately? |
|----------------------|-----------------------------------------------------------------------|-----------------------------------------------------------|----------------------------------|-----------------------------------------------------------------|---------------------------------------------------------------------------------------|---------------------------------------------------------------------|---------------------------------------------------------------------------------|------------------------------------------------|-------------------------------------------------------------------------------------------------|
| Agrawal, 2012        | Yes                                                                   | No                                                        | Yes                              | Yes                                                             | Unclear                                                                               | Yes                                                                 | Yes                                                                             | Yes                                            | Yes                                                                                             |
| Coresh, 2005         | Yes                                                                   | Yes                                                       | Yes                              | Yes                                                             | Yes                                                                                   | Yes                                                                 | Yes                                                                             | Yes                                            | Yes                                                                                             |
| Dharmarajan, 2017    | Yes                                                                   | Yes                                                       | Yes                              | Yes                                                             | Unclear                                                                               | Yes                                                                 | Yes                                                                             | Yes                                            | Yes                                                                                             |
| Flessner, M.F., 2009 | Yes                                                                   | Yes                                                       | Yes                              | Yes                                                             | Unclear                                                                               | Yes                                                                 | Yes                                                                             | Yes                                            | Yes                                                                                             |
| Gaffney, 2014        | Yes                                                                   | Yes                                                       | Yes                              | Yes                                                             | Yes                                                                                   | Yes                                                                 | Yes                                                                             | Yes                                            | Unclear                                                                                         |
| Hsu, C, 2006         | Yes                                                                   | Yes                                                       | Yes                              | Yes                                                             | No                                                                                    | Yes                                                                 | Yes                                                                             | Yes                                            | Yes                                                                                             |
| Hsu, Y, 2014         | Yes                                                                   | Unclear                                                   | Yes                              | Yes                                                             | Unclear                                                                               | Yes                                                                 | Yes                                                                             | Yes                                            | Unclear                                                                                         |
| McClellan, 2008      | Yes                                                                   | Yes                                                       | Yes                              | Yes                                                             | Yes                                                                                   | Yes                                                                 | Yes                                                                             | Yes                                            | Yes                                                                                             |
| Nickolas, 2004       | Yes                                                                   | Yes                                                       | Yes                              | Yes                                                             | Unclear                                                                               | Yes                                                                 | Yes                                                                             | Yes                                            | Yes                                                                                             |
| Nguyen, 2017         | Yes                                                                   | Yes                                                       | Yes                              | Yes                                                             | Unclear                                                                               | Yes                                                                 | Yes                                                                             | Yes                                            | Yes                                                                                             |
| Obadan, 2017         | Yes                                                                   | No                                                        | Yes                              | No                                                              | No                                                                                    | Yes                                                                 | Yes                                                                             | Yes                                            | Unclear                                                                                         |
| Plantinga, 2008      | Yes                                                                   | Yes                                                       | Yes                              | Yes                                                             | Yes                                                                                   | Yes                                                                 | Yes                                                                             | Yes                                            | Yes                                                                                             |
| Plantinga, 2011      | Yes                                                                   | Yes                                                       | Yes                              | Yes                                                             | Yes                                                                                   | Yes                                                                 | Yes                                                                             | Yes                                            | Yes                                                                                             |
| Saab, 2008           | Yes                                                                   | No                                                        | Yes                              | Yes                                                             | Unclear                                                                               | Yes                                                                 | Yes                                                                             | Yes                                            | Yes                                                                                             |
| Sarafidis, 2008      | Yes                                                                   | No                                                        | Yes                              | Yes                                                             | Unclear                                                                               | Yes                                                                 | Yes                                                                             | Yes                                            | Yes                                                                                             |
| Saunders, 2015       | Yes                                                                   | Yes                                                       | Yes                              | No                                                              | Unclear                                                                               | Yes                                                                 | Yes                                                                             | Yes                                            | Unclear                                                                                         |
| Shah, 2012           | Yes                                                                   | No                                                        | Yes                              | Yes                                                             | Unclear                                                                               | Yes                                                                 | Yes                                                                             | Yes                                            | Yes                                                                                             |
| Shirazian, 2016      | Yes                                                                   | Yes                                                       | Yes                              | Yes                                                             | Yes                                                                                   | Yes                                                                 | Yes                                                                             | Yes                                            | Yes                                                                                             |
| Szzech, 2014         | Yes                                                                   | Yes                                                       | Yes                              | Yes                                                             | Yes                                                                                   | Yes                                                                 | Yes                                                                             | Yes                                            | Yes                                                                                             |
| Tan, 2010            | Yes                                                                   | Unclear                                                   | Yes                              | Yes                                                             | Unclear                                                                               | Yes                                                                 | Yes                                                                             | Yes                                            | Unclear                                                                                         |
| Tuot, 2011           | Yes                                                                   | Yes                                                       | Yes                              | Yes                                                             | Yes                                                                                   | Yes                                                                 | Yes                                                                             | Yes                                            | Yes                                                                                             |
| Tuot, 2012           | Yes                                                                   | Yes                                                       | Yes                              | Yes                                                             | Yes                                                                                   | Yes                                                                 | Yes                                                                             | Yes                                            | Yes                                                                                             |
| Tuot, 2016           | Yes                                                                   | No                                                        | Yes                              | Yes                                                             | Unclear                                                                               | Yes                                                                 | Yes                                                                             | Yes                                            | Yes                                                                                             |
| Verhave, 2014        | Yes                                                                   | Yes                                                       | Yes                              | Yes                                                             | Unclear                                                                               | Yes                                                                 | Yes                                                                             | Yes                                            | Yes                                                                                             |
| Wagner, 2017         | Yes                                                                   | Yes                                                       | Yes                              | Yes                                                             | Unclear                                                                               | Yes                                                                 | Yes                                                                             | Yes                                            | Unclear                                                                                         |
| Wang, 2014           | Yes                                                                   | Yes                                                       | Yes                              | Yes                                                             | Yes                                                                                   | Yes                                                                 | Yes                                                                             | Yes                                            | Yes                                                                                             |
| Whaley-Connell, 2009 | Yes                                                                   | No                                                        | Yes                              | Yes                                                             | Unclear                                                                               | Yes                                                                 | Yes                                                                             | Yes                                            | Yes                                                                                             |
| Whaley-Connell, 2012 | Yes                                                                   | No                                                        | Yes                              | Yes                                                             | Unclear                                                                               | Yes                                                                 | Yes                                                                             | Yes                                            | Yes                                                                                             |
| Wright Nunes, 2011   | Yes                                                                   | Yes                                                       | Yes                              | Yes                                                             | Yes                                                                                   | Yes                                                                 | Yes                                                                             | Yes                                            | Unclear                                                                                         |
| Wright, 2011         | Yes                                                                   | Yes                                                       | Yes                              | Yes                                                             | Yes                                                                                   | Yes                                                                 | Yes                                                                             | Yes                                            | Unclear                                                                                         |
| Wright-Nunes, 2012   | Yes                                                                   | Yes                                                       | Yes                              | Yes                                                             | Yes                                                                                   | Yes                                                                 | Yes                                                                             | Yes                                            | Unclear                                                                                         |
| Wright Nunes, 2013   | Yes                                                                   | Yes                                                       | Yes                              | Yes                                                             | Yes                                                                                   | Yes                                                                 | Yes                                                                             | Yes                                            | Unclear                                                                                         |
